# Supplementary material for: Host-Guest Interaction of Cucurbit[8]uril with N-(3-Aminopropyl)cyclohexylamine: Cyclohexyl Encapsulation Triggered Ternary Complex
Source: MDPI journal article supplement (doi:10.3390/molecules23010175), 2018-01-15
Supplement: s1 [file s1]

## Supporting information

# Host-guest interaction of cucurbit[8]uril with N-(3-Aminopropyl)cyclohexylamine: cyclohexylalkane encapsulation triggered ternary complex

Yu Xia<sup>1</sup>, Chuan-Zeng Wang<sup>1</sup>, Mengkui Tian<sup>1</sup>, Zhu Tao<sup>1</sup>, Xin-Long Ni<sup>1\*</sup>, Timothy J. Prior<sup>2</sup> and Carl Redshaw<sup>2\*</sup>

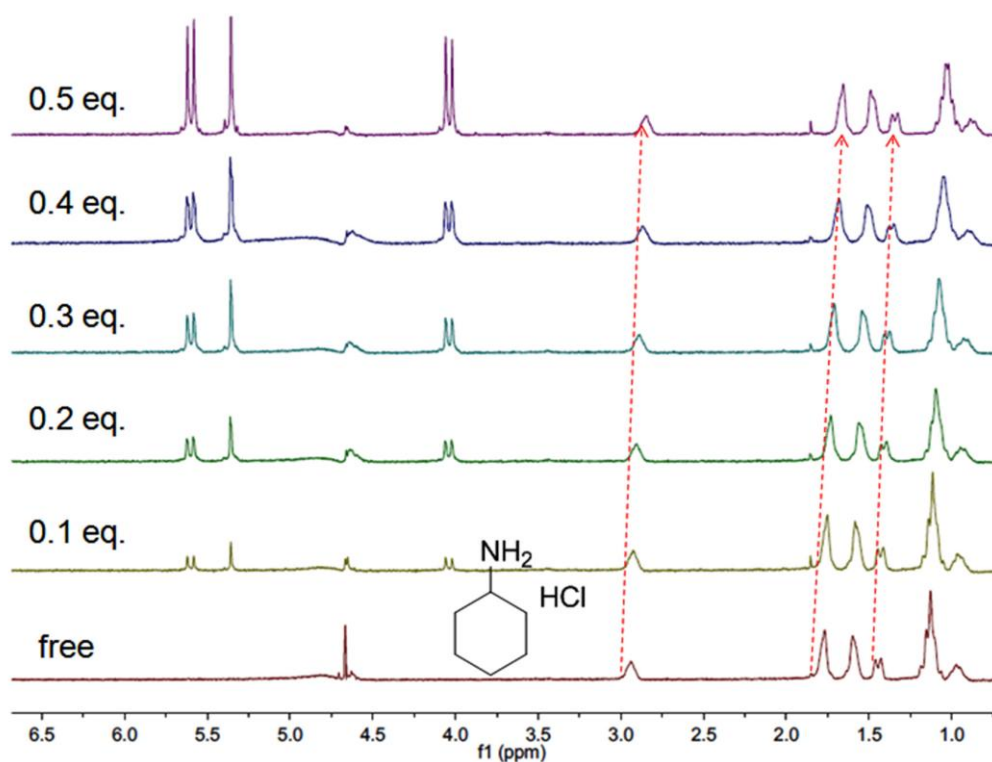

Figure S1. <sup>1</sup>H NMR titration spectra of the CyA guest in D<sub>2</sub>O (1.0 mmol, pD = 2.45) with increasing concentrations of the Q[8] host at room temperature.

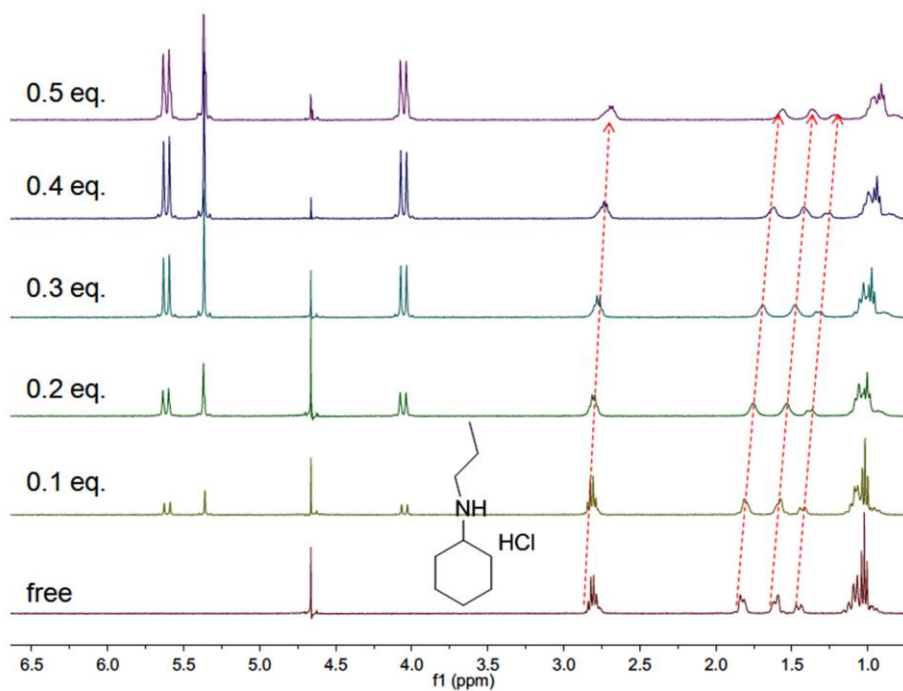

Figure S2.  $^1\text{H}$  NMR titration spectra of the **NECyA** guest in  $\text{D}_2\text{O}$  (1.0 mmol,  $\text{pD} = 2.45$ ) with increasing concentrations of **Q[8]** host at room temperature.

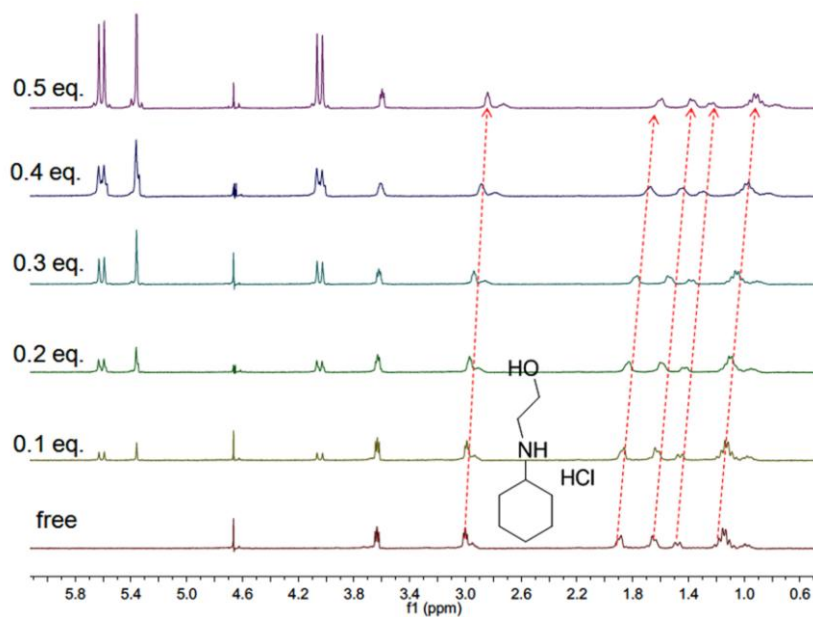

Figure S3.  $^1\text{H}$  NMR titration spectra of the **NCyEA** guest in  $\text{D}_2\text{O}$  (1.0 mmol,  $\text{pD} = 2.45$ ) with increasing concentrations of the **Q[8]** host at room temperature.

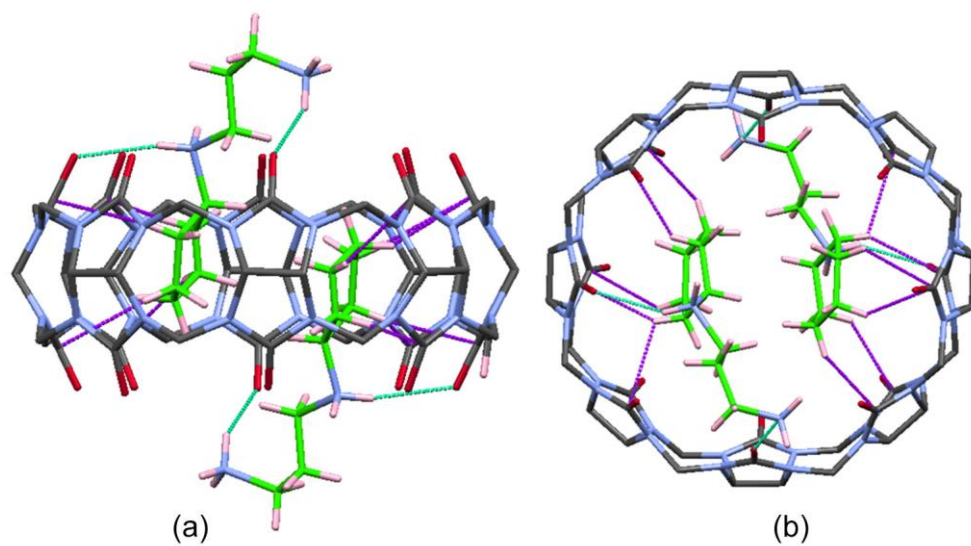

Figure S4. X-ray structure of Q[8]•N3ACyA: (a) side view; (b) top view; hydrogen bond (green), C-H... $\pi$  interaction (magenta). Hydrogen atoms, solvate water molecules, and  $[\text{CdCl}_4]^{2-}$  dianions are omitted for clarity.
